# Supplementary material
Source: Springer Nature journal article supplement (https://www.springermedizin.de/resource/supplementary/13014_2014_1142_MOESM8_ESM.pdf/9634984)

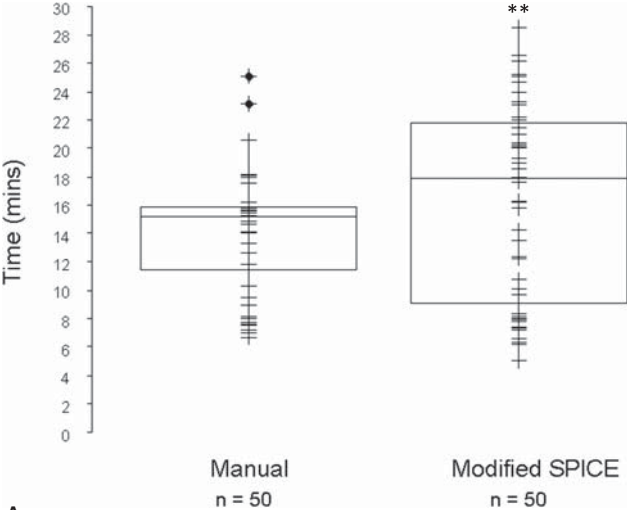

**A**

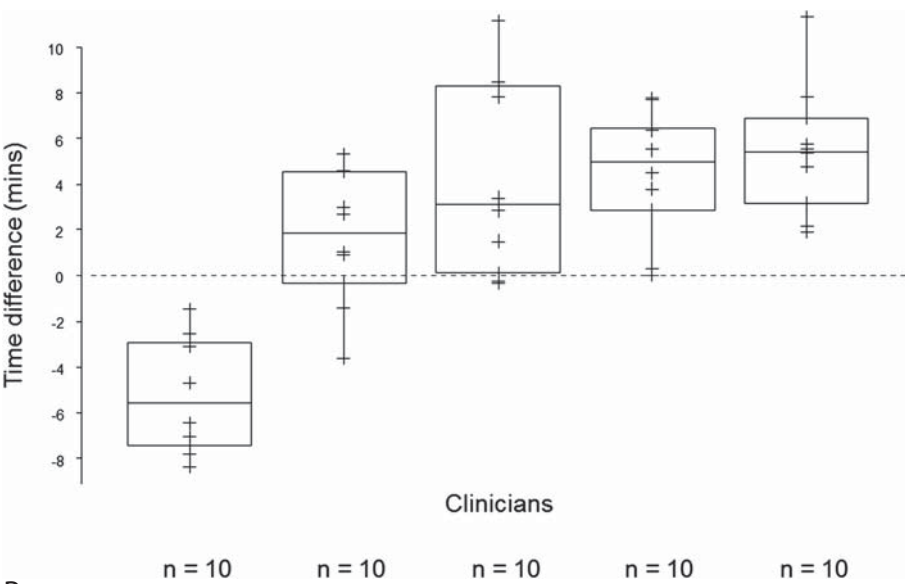

**B**

Supplement: MOESM8 [file 9634984]
